# Supplementary material for: Explainable Machine Learning with Pairwise Interactions for Predicting Conversion from Mild Cognitive Impairment to Alzheimer’s Disease Utilizing Multi-Modalities Data
Source: MDPI journal article supplement (doi:10.3390/brainsci13111535), 2023-10-31
Supplement: s1 [file s1]

Supplementary

For a more detailed visualization of the results of local explanation of EBM model, consider **Supplementary Figure S1**

Local Explanation (Actual Class: 1 | Predicted Class: 1  
Pr(y = 1): 0.919)

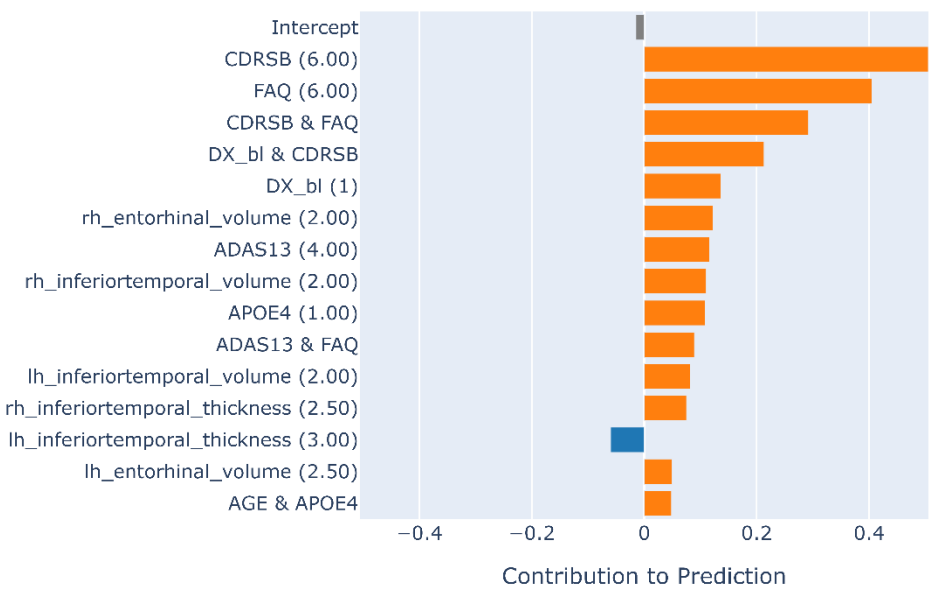

Supplementary Figure S1. The local interpretation provided by EBM model of Patient 1.

Local Explanation (Actual Class: 1 | Predicted Class: 1  
Pr(y = 1): 0.950)

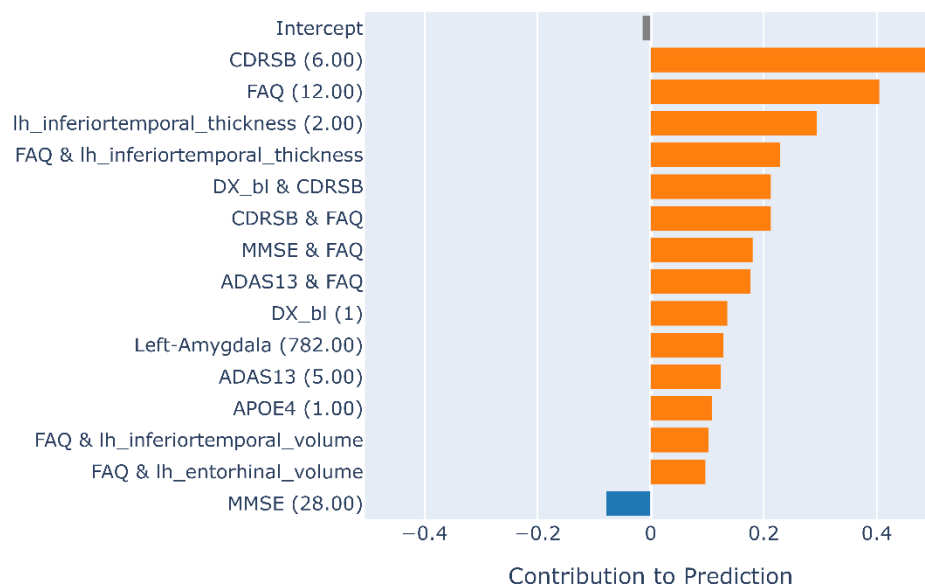

Supplementary Figure S2. The local interpretation provided by EBM model of Patient 2.

Local Explanation (Actual Class: 0 | Predicted Class: 0  
Pr(y = 0): 0.866)

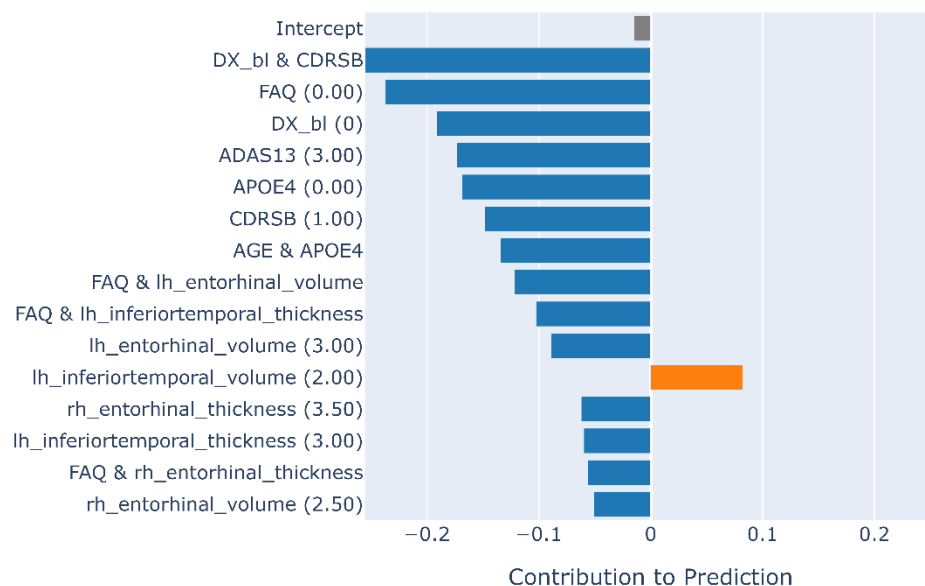

Supplementary Figure S3. The local interpretation provided by EBM model of Patient 3.

Local Explanation (Actual Class: 0 | Predicted Class: 0  
 $\Pr(y = 0): 0.857$ )

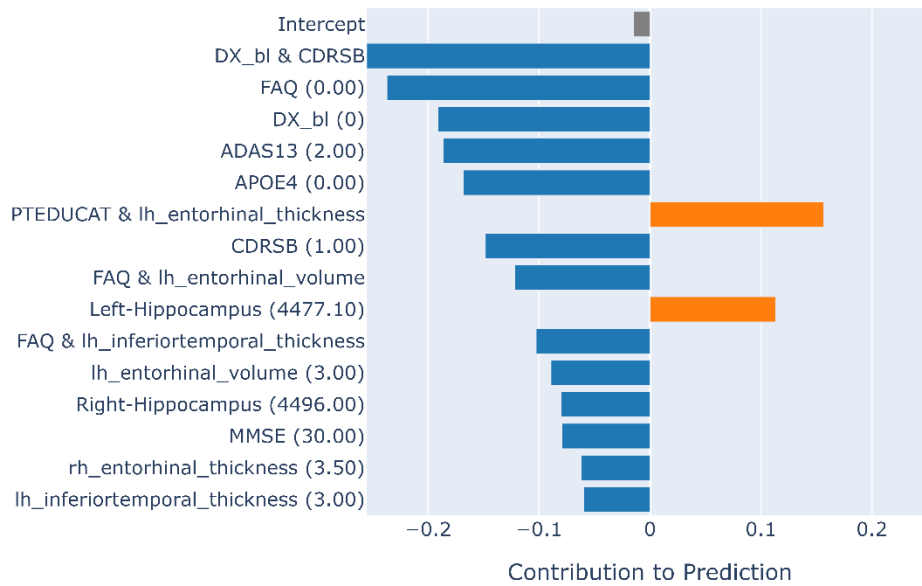

Supplementary Figure S4. The local interpretation provided by EBM model of Patient 4.
